# Supplementary material for: Anin situencapsulation approach for polysulfide retention in lithium–sulfur batteries
Source: Royal Society of Chemistry journal article supplement (doi:10.1039/c9ta14003d), 2020-01-01
Supplement: c9ta14003d1.pdf [file c9ta14003d1.pdf]

## Supplementary information

### An in-situ encapsulation approach for polysulfide retention in lithium-sulfur batteries

Y. X. Ren<sup>#</sup>, H. R. Jiang<sup>#</sup>, C. Xiong, C. Zhao, T. S. Zhao\*

<sup>a</sup>HKUST Energy Institute,

<sup>b</sup>Department of Mechanical and Aerospace Engineering, The Hong Kong University  
of Science and Technology, Clear Water Bay, Kowloon, Hong Kong SAR, China.

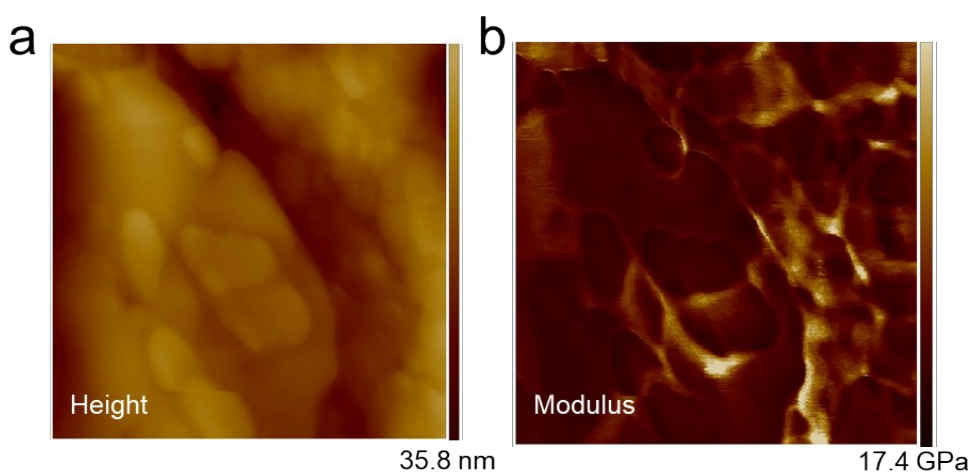

Fig. S1 The atomic force microscopy (AFM) image. (a, b) The distribution of height (a) and modulus (b). Young's modulus is calculated using a DMT model that is applied to the unloading portion of the force-separation curve<sup>1</sup>. The measured area is 500 nm x 500 nm.

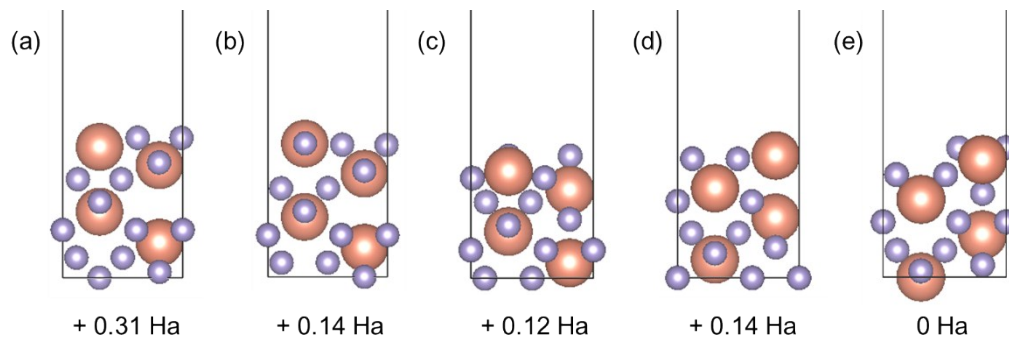

Fig. S2 The optimized atomic structures and relative energies of  $\text{SbF}_3$  (100) surface with different terminations.

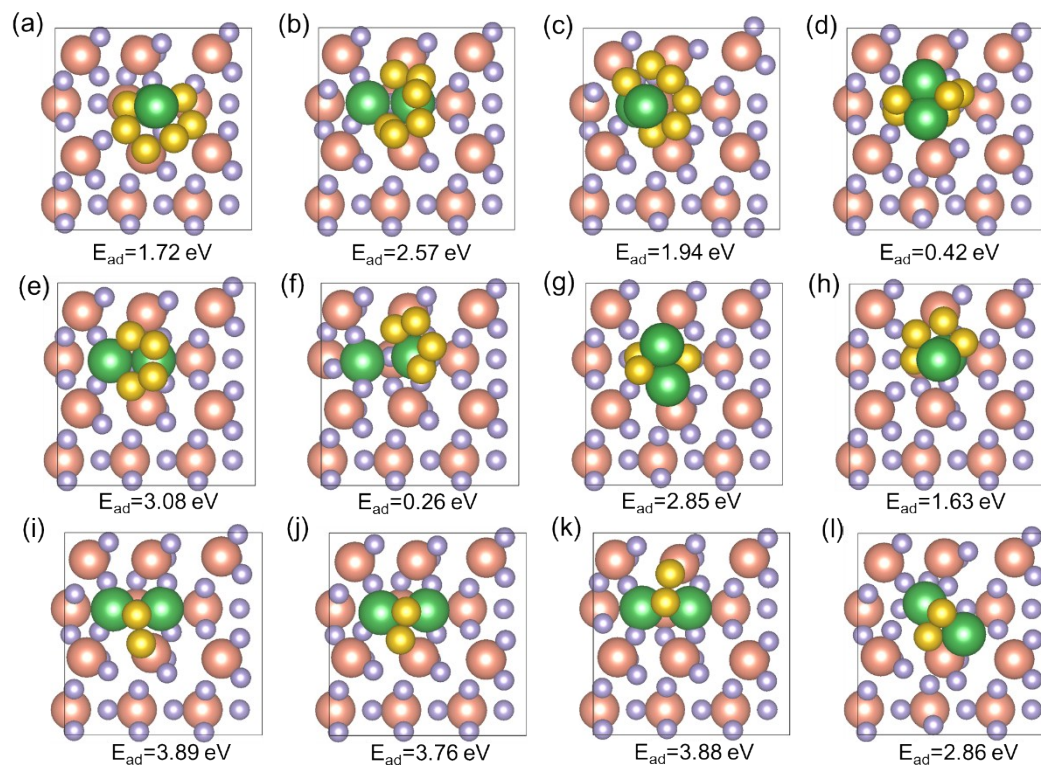

Fig. S3 (a-d) The representative structures of  $\text{Li}_2\text{S}_6$  adsorbed on  $\text{SbF}_3$  (200) surface; (e-h) the representative structures of  $\text{Li}_2\text{S}_4$  adsorbed on  $\text{SbF}_3$  (200) surface; (i-l) the representative structures of  $\text{Li}_2\text{S}_2$  adsorbed on  $\text{SbF}_3$  (200) surface.

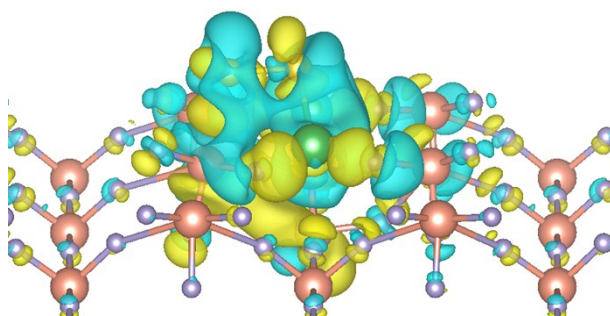

Fig. S4 Charge density difference plots showing the adsorption of  $\text{Li}_2\text{S}_2$  on the substrate of  $\text{SbF}_3$  (200).

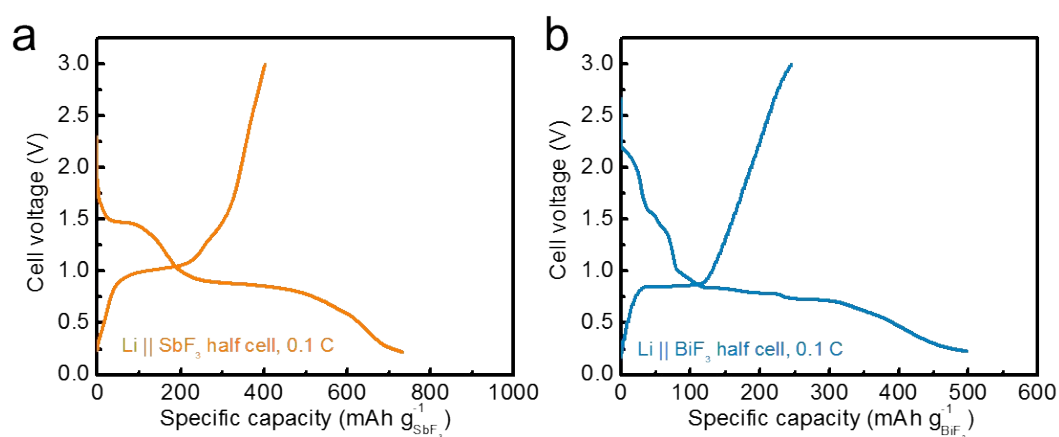

Fig. S5 Lithiation/delithiation voltage profiles for  $\text{SbF}_3$  and  $\text{BiF}_3$ .  $\text{SbF}_3$  starts to be lithiated below 1.5 V (versus Li), outside the voltage window of Li-S battery.

### Supplementary Note 1

To fabricate the electrode,  $\text{SbF}_3$  or  $\text{BiF}_3$  was mixed with Super P and PVDF with a mass ratio of 8:1:1 to form a homogeneous slurry in NMP. The slurry was blade-casted on Al foil and dried at 110 °C. The  $\text{SbF}_3$  or  $\text{BiF}_3$  electrode (12 mm in diameter, 0.8 mg  $\text{cm}^{-2}$  active material loading) was paired with a Li foil anode (16 mm in diameter). One Celgard 2500 separator was set in between the electrodes. 100  $\mu\text{L}$  classical liquid electrolyte (1.0 M LiTFSI in DOL/DME, 1.0 wt%  $\text{LiNO}_3$ ) was added.

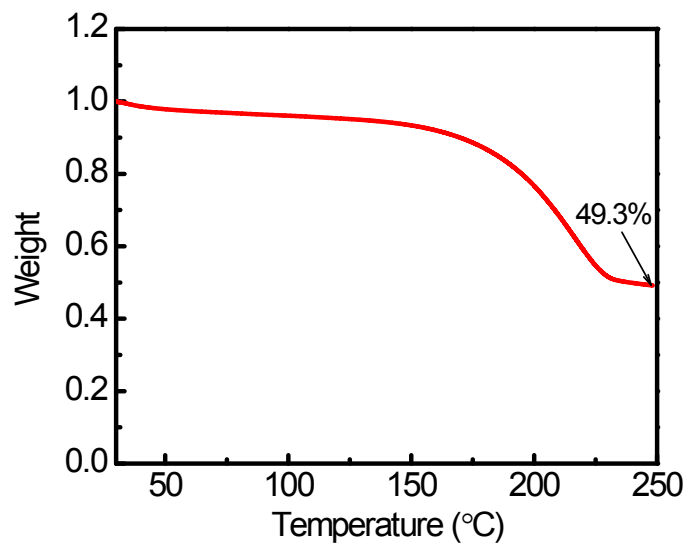

Fig. S6 TGA analysis of the S/C composite.

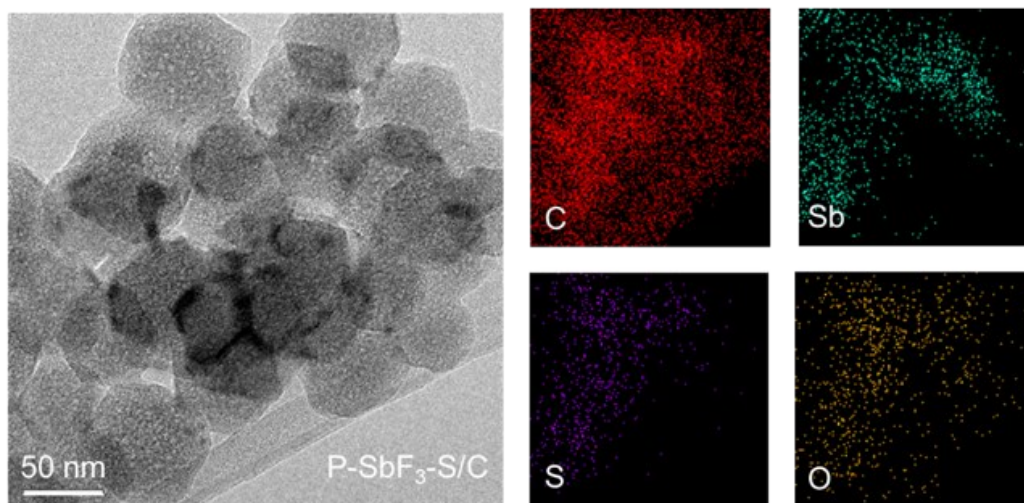

Fig. S7 TEM/EDX images of P-SbF<sub>3</sub>-S/C, the TEM image can be also found in Fig.

4b.

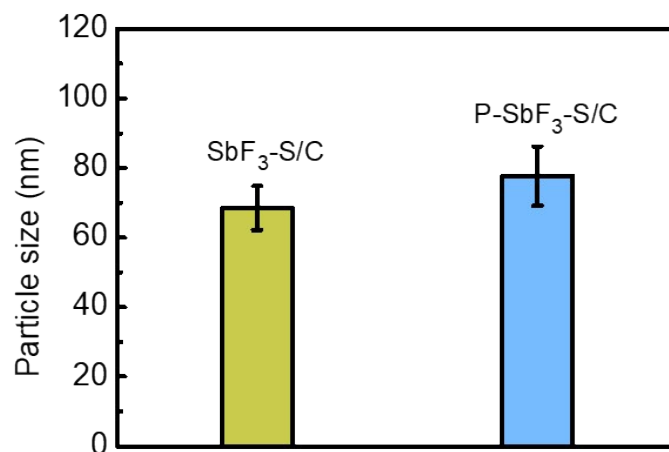

Fig. S8 The average particle size of SbF<sub>3</sub>-S/C and P-SbF<sub>3</sub>-S/C (number of samples:8).

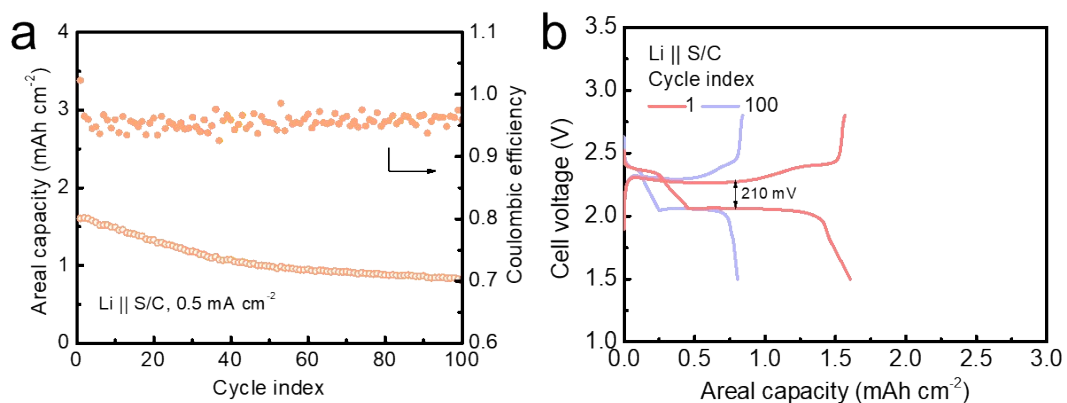

Fig. S9 (a) Cyclability of the Li-S battery with the bare S/C electrode, and (b) the corresponding voltage profiles.

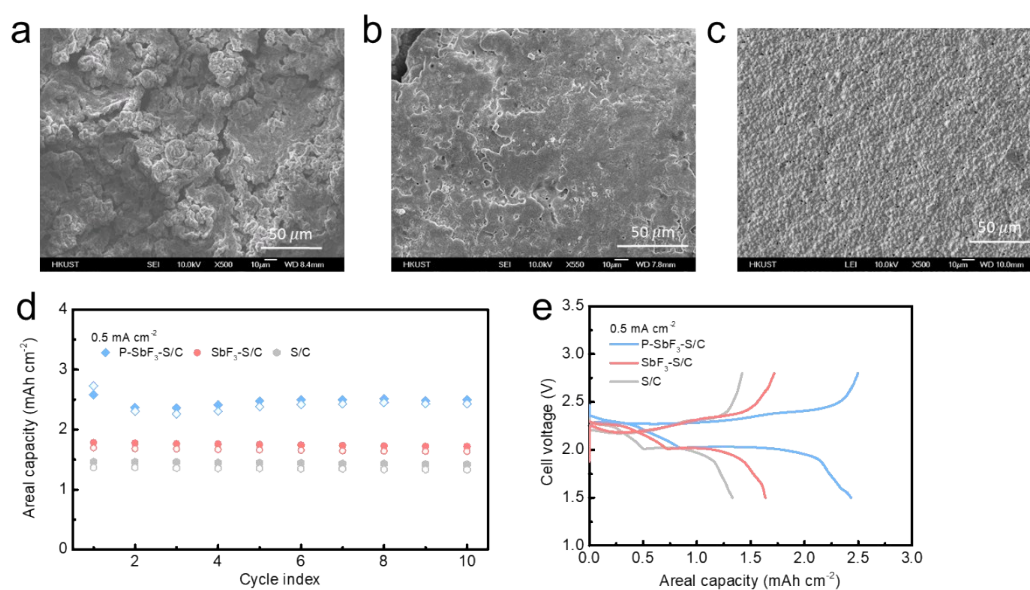

Fig. S10 (a-c) Surface SEM images of the cycled Li metal anodes from half cells with S/C (a), SbF<sub>3</sub>/S/C (b), or P-SbF<sub>3</sub>-S/C (c) cathode, respectively. (d, e) Cyclability of the Li-S battery with these three electrodes, and the corresponding voltage profiles at the 10<sup>th</sup> cycle. The three half cells were cycled for 10 times respectively at 0.5 mA cm<sup>-2</sup>, and unpacked at the charged state for characterizations.

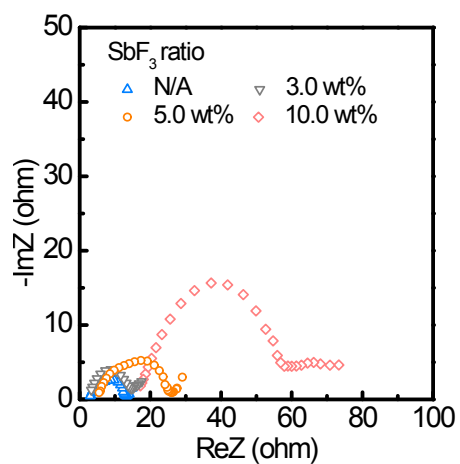

Fig. S11 Electrochemical impedance spectroscopy (EIS) of charged Li || P-SbF<sub>3</sub>-S/C half cell with different ratios of SbF<sub>3</sub>.

## References

1. T. Young, M. Monclus, T. Burnett, W. Broughton, S. Ogin and P. Smith, *Measurement Science and Technology*, 2011, **22**, 125703.
